# Supplementary material
Source: PubMed Central journal article supplement (PMC1475465)
Supplement: plntphys_pp.106.081208_2.pdf [file plntphys_pp.106.081208_2.pdf]

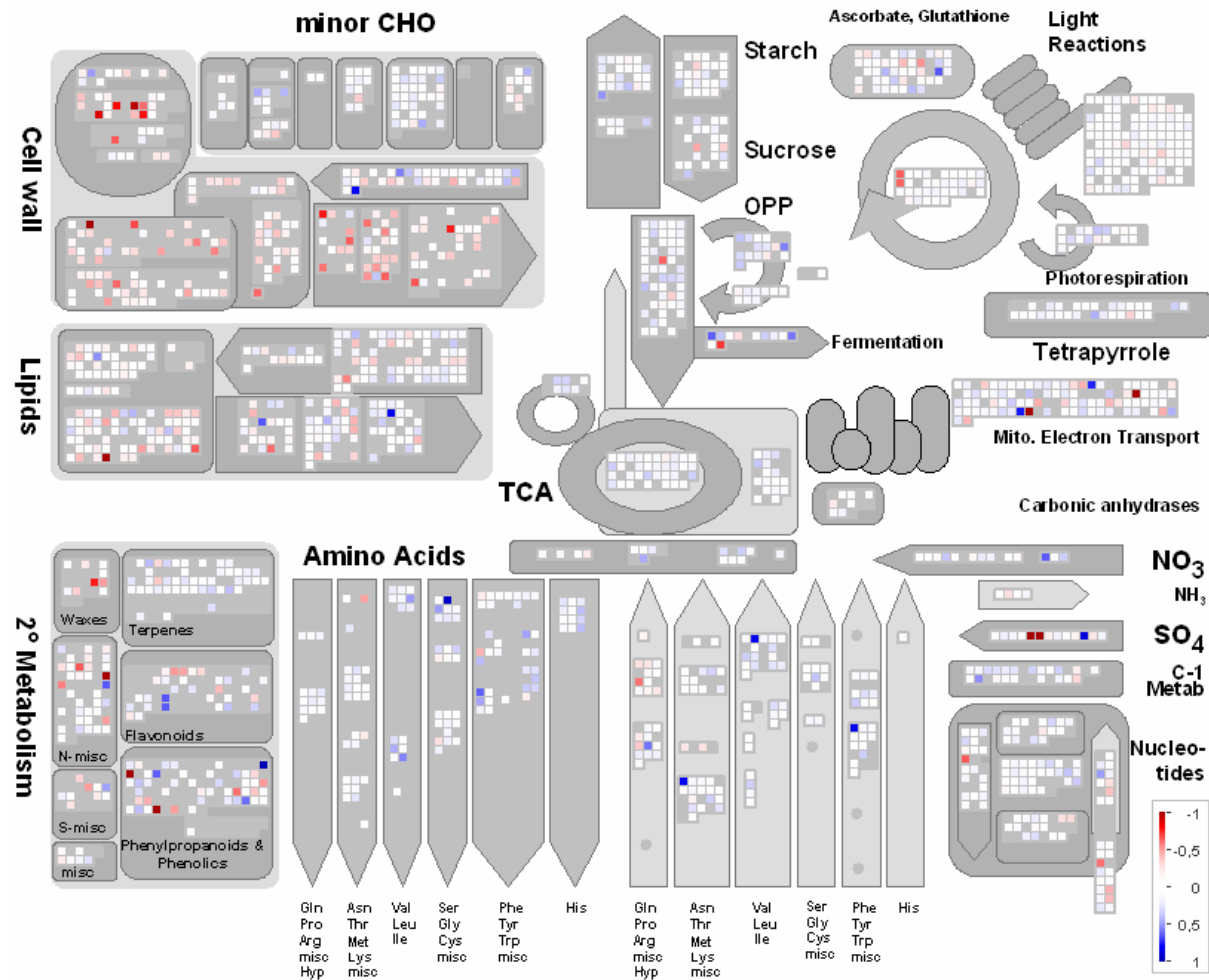

**Figure 2S.** Mapman visualisation of changes in expression of genes assigned to the major metabolic pathways as induced by a 1h incubation of leaf discs in 5 mM DTT. Colour codes of the spots relate to the level of expression ( $\log_2[\text{ratio}]$ ) as indicated in the legend (blue: increased expression; red: decreased expression; white; no change in expression; grey: no measurable signal).
