# Supplementary material
Source: PubMed Central journal article supplement (PMC1475465)
Supplement: plntphys_pp.106.081208_3.pdf [file plntphys_pp.106.081208_3.pdf]

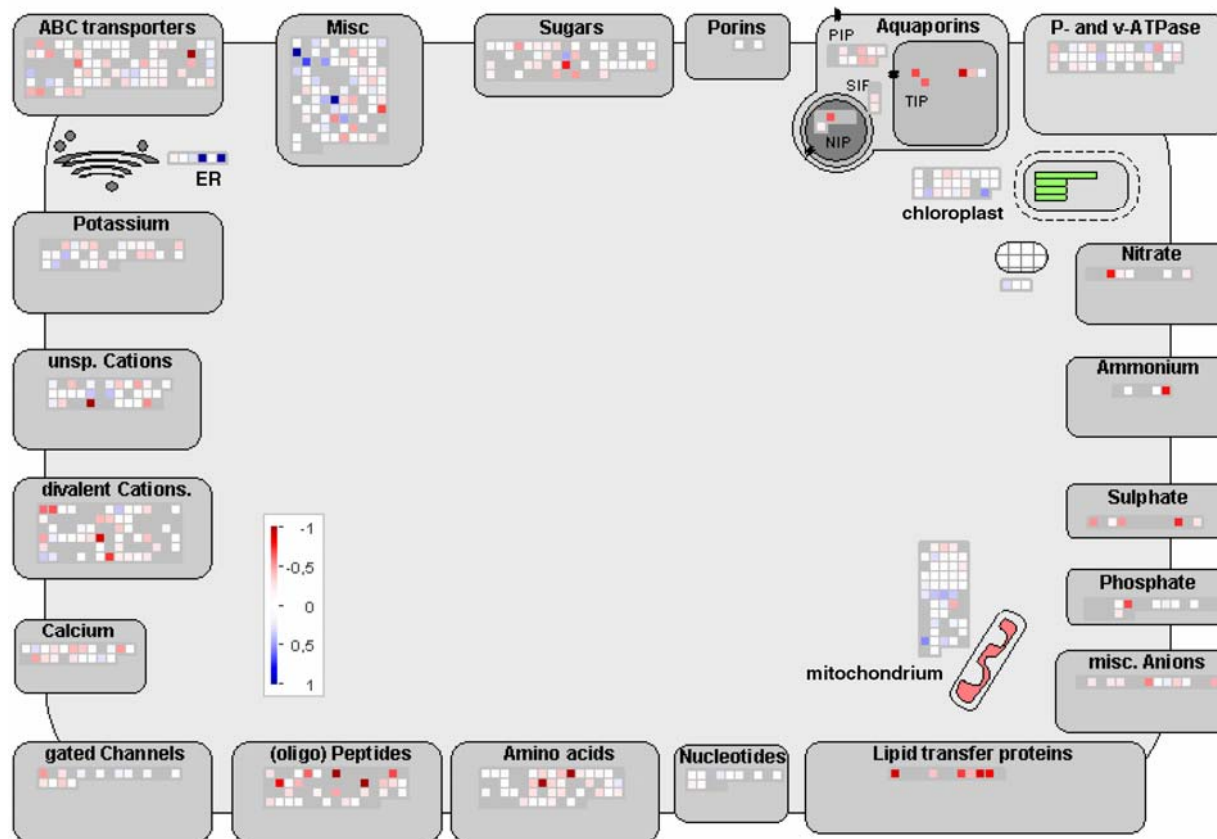

**Figure 3S.** Mapman visualisation of changes in expression of genes encoding various classes of transporters as induced by a 1h incubation of leaf discs in 5mM DTT. Colour codes are defined as in Figure 2S.
