# Supplementary material
Source: PubMed Central journal article supplement (PMC1475465)
Supplement: plntphys_pp.106.081208_4.pdf [file plntphys_pp.106.081208_4.pdf]

**Table 1S.** Changes in metabolite levels after incubation of *Arabidopsis* leaf discs in 5 mM DTT. Incubations were performed exactly as described in Fig. 1 before material was frozen in liquid nitrogen for metabolite analysis. Changes in metabolite levels were calculated as the ratio between DTT and buffer incubated samples. P-values were calculated using the student's t-test of the Microsoft-Excel software. Changes that are significantly different from the control (p-value below 0.05) are highlighted in bold. Ascorbate and dehydroascorbate data are indicative for the total ascorbate pool, but do not necessarily reflect *in-vivo* ascorbate/dehydroascorbate ratios, since the extraction method does not reliably conserve the moieties of this couple in their native form. Results are the mean  $\pm$  SE ( $n=5$ ).

|                          | control            | 5 mM DTT            | p-value           |
|--------------------------|--------------------|---------------------|-------------------|
| <b>SUGARS</b>            |                    |                     |                   |
| arabinose                | 1,000 $\pm$ 0,0111 | 1,2110 $\pm$ 0,0117 | <b>&lt;0,0001</b> |
| erythritol               | 1,000 $\pm$ 0,0094 | 1,2378 $\pm$ 0,1176 | <b>0,0489</b>     |
| fructose                 | 1,000 $\pm$ 0,0226 | 1,1311 $\pm$ 0,0211 | <b>&lt;0,0001</b> |
| fucose                   | 1,000 $\pm$ 0,1684 | 1,3568 $\pm$ 0,0205 | 0,0855            |
| galactose                | 1,000 $\pm$ 0,0102 | 1,4900 $\pm$ 0,0095 | <b>&lt;0,0001</b> |
| glucose                  | 1,000 $\pm$ 0,0336 | 1,0826 $\pm$ 0,0296 | 0,0537            |
| glycerol                 | 1,000 $\pm$ 0,0345 | 1,1798 $\pm$ 0,0580 | 0,0578            |
| isomaltose               | 1,000 $\pm$ 0,0495 | 1,0867 $\pm$ 0,0625 | 0,3685            |
| maltitol                 | 1,000 $\pm$ 0,0620 | 1,0569 $\pm$ 0,0634 | 0,5820            |
| maltose                  | 1,000 $\pm$ 0,0481 | 1,0802 $\pm$ 0,0966 | 0,5383            |
| mannose                  | 1,000 $\pm$ 0,0380 | 1,1323 $\pm$ 0,0266 | <b>0,0320</b>     |
| mannitol                 | 1,000 $\pm$ 0,0357 | 0,9491 $\pm$ 0,0533 | 0,4700            |
| myo-inositol             | 1,000 $\pm$ 0,0088 | 1,0064 $\pm$ 0,0040 | 0,5582            |
| ononitol                 | 1,000 $\pm$ 0,0332 | 1,0313 $\pm$ 0,0544 | 0,6706            |
| raffinose                | 1,000 $\pm$ 0,5163 | 1,0001 $\pm$ 0,5427 | 0,9999            |
| rhamnose                 | 1,000 $\pm$ 0,0331 | 0,9882 $\pm$ 0,0282 | 0,8079            |
| ribose                   | 1,000 $\pm$ 0,0155 | 1,9542 $\pm$ 0,0239 | <b>&lt;0,0001</b> |
| sorbitol/galactitol      | 1,000 $\pm$ 0,0520 | 0,8623 $\pm$ 0,1360 | 0,3505            |
| sucrose                  | 1,000 $\pm$ 0,0451 | 1,0587 $\pm$ 0,1147 | 0,1330            |
| trehalose                | 1,000 $\pm$ 0,0248 | 0,9796 $\pm$ 0,0241 | 0,5978            |
| xylose                   | 1,000 $\pm$ 0,0175 | 1,1510 $\pm$ 0,0144 | <b>0,0020</b>     |
| <b>ORGANIC ACIDS</b>     |                    |                     |                   |
| aconitate                | 1,000 $\pm$ 0,1092 | 0,8412 $\pm$ 0,1921 | 0,4745            |
| $\alpha$ -keto-glutarate | 1,000 $\pm$ 0,1687 | 0,8344 $\pm$ 0,1809 | 0,5193            |
| $\alpha$ -keto-gulonate  | 1,000 $\pm$ 0,1175 | 0,9455 $\pm$ 0,0879 | 0,7365            |
| benzoate                 | 1,000 $\pm$ 0,0224 | 1,0922 $\pm$ 0,0255 | <b>0,0402</b>     |
| c-caffeate               | 1,000 $\pm$ 0,1225 | 1,1511 $\pm$ 0,2115 | 0,6236            |
| chlorogenate             | 1,000 $\pm$ 0,1146 | 0,7503 $\pm$ 0,1911 | 0,2426            |
| citramalate              | 1,000 $\pm$ 0,0252 | 1,0684 $\pm$ 0,0173 | 0,0735            |
| citrate                  | 1,000 $\pm$ 0,1160 | 0,9900 $\pm$ 0,1096 | 0,9554            |
| c-sinapate               | 1,000 $\pm$ 0,0897 | 0,8283 $\pm$ 0,1001 | 0,2283            |
| dehydroascorbate         | 1,000 $\pm$ 0,0685 | 1,2359 $\pm$ 0,0520 | <b>0,0448</b>     |
| D-isoascorbate           | 1,000 $\pm$ 0,1901 | 1,7155 $\pm$ 0,1259 | <b>0,0466</b>     |
| fumarate                 | 1,000 $\pm$ 0,0200 | 1,0867 $\pm$ 0,0211 | <b>0,0262</b>     |
| galactonate              | 1,000 $\pm$ 0,0413 | 0,9931 $\pm$ 0,0945 | 0,9521            |
| galacturonate            | 1,000 $\pm$ 0,0911 | 0,8998 $\pm$ 0,1189 | 0,5295            |
| g-aminobutyrate          | 1,000 $\pm$ 0,1810 | 0,8629 $\pm$ 0,1629 | 0,5968            |
| gluconate                | 1,000 $\pm$ 0,0185 | 0,8244 $\pm$ 0,0859 | 0,0534            |
| glycerate                | 1,000 $\pm$ 0,0117 | 1,0216 $\pm$ 0,0077 | 0,1929            |
| gulonate                 | 1,000 $\pm$ 0,1748 | 0,9152 $\pm$ 0,1687 | 0,4690            |
| isocitrate               | 1,000 $\pm$ 0,1463 | 0,8881 $\pm$ 0,1313 | 0,5971            |
| L-ascorbate              | 1,000 $\pm$ 0,1128 | 1,8999 $\pm$ 0,0937 | <b>0,0030</b>     |
| maleate                  | 1,000 $\pm$ 0,0689 | 1,0269 $\pm$ 0,0742 | 0,8156            |
| malate                   | 1,000 $\pm$ 0,0351 | 1,1257 $\pm$ 0,0492 | 0,1108            |
| nicotinate               | 1,000 $\pm$ 0,2579 | 1,1269 $\pm$ 0,3635 | 0,8157            |
| phospate                 | 1,000 $\pm$ 0,1282 | 0,8578 $\pm$ 0,1540 | 0,4969            |
| pyroglutaminate          | 1,000 $\pm$ 0,0570 | 0,8662 $\pm$ 0,0311 | 0,0813            |
| pyruvate                 | 1,000 $\pm$ 0,2143 | 0,7321 $\pm$ 0,1786 | 0,1786            |
| quininate                | 1,000 $\pm$ 0,2397 | 0,9786 $\pm$ 0,1908 | 0,9500            |
| shikimate                | 1,000 $\pm$ 0,0244 | 1,1968 $\pm$ 0,0433 | <b>0,0105</b>     |
| succinate                | 1,000 $\pm$ 0,0112 | 1,0927 $\pm$ 0,0068 | <b>0,0001</b>     |
| threonate                | 1,000 $\pm$ 0,0309 | 0,7965 $\pm$ 0,0400 | <b>0,0019</b>     |
| t-sinapate               | 1,000 $\pm$ 0,1864 | 0,6911 $\pm$ 0,2059 | 0,2568            |

AMINO ACIDS

|               |       |   |        |        |   |        |               |
|---------------|-------|---|--------|--------|---|--------|---------------|
| alanine       | 1,000 | ± | 0,1522 | 2,0599 | ± | 0,0759 | <b>0,0013</b> |
| arginine      | 1,000 | ± | 0,0666 | 2,2987 | ± | 0,1302 | <b>0,0031</b> |
| asparagine    | 1,000 | ± | 0,1256 | 1,4950 | ± | 0,0849 | <b>0,0299</b> |
| aspartate     | 1,000 | ± | 0,2874 | 0,8530 | ± | 0,3684 | 0,7592        |
| β-alanine     | 1,000 | ± | 0,1372 | 0,9381 | ± | 0,1299 | 0,7647        |
| cysteine      | 1,000 | ± | 0,1044 | 1,3180 | ± | 0,1531 | 0,2303        |
| glutamate     | 1,000 | ± | 0,5199 | 0,5200 | ± | 0,7232 | 0,5101        |
| glutamine     | 1,000 | ± | 0,0917 | 1,0009 | ± | 0,0607 | 0,9945        |
| glycine       | 1,000 | ± | 0,0672 | 0,9924 | ± | 0,2592 | 0,9796        |
| homocysteine  | 1,000 | ± | 0,0731 | 1,3524 | ± | 0,0777 | <b>0,0307</b> |
| homoserine    | 1,000 | ± | 0,0445 | 1,2558 | ± | 0,0550 | <b>0,0175</b> |
| isoleucine    | 1,000 | ± | 0,0422 | 1,1922 | ± | 0,0509 | <b>0,0390</b> |
| leucine       | 1,000 | ± | 0,0228 | 1,2414 | ± | 0,0302 | <b>0,0005</b> |
| lysine        | 1,000 | ± | 0,1844 | 0,9822 | ± | 0,0906 | 0,9383        |
| methionine    | 1,000 | ± | 0,2189 | 1,0456 | ± | 0,1994 | 0,8932        |
| N-acet-serine | 1,000 | ± | 0,0829 | 0,3587 | ± | 0,2912 | <b>0,0014</b> |
| noradrenalin  | 1,000 | ± | 0,3188 | 0,6726 | ± | 0,1381 | 0,3891        |
| O-acet-serine | 1,000 | ± | 0,2816 | 0,3111 | ± | 0,1349 | <b>0,0417</b> |
| ornithine     | 1,000 | ± | 0,0528 | 1,0381 | ± | 0,0331 | 0,5925        |
| phenylalanine | 1,000 | ± | 0,3964 | 0,9922 | ± | 0,4534 | 0,9908        |
| proline       | 1,000 | ± | 0,0565 | 1,1988 | ± | 0,0516 | <b>0,0499</b> |
| putrescine    | 1,000 | ± | 0,0719 | 0,8679 | ± | 0,0568 | 0,1966        |
| serine        | 1,000 | ± | 0,0351 | 0,7000 | ± | 0,0812 | <b>0,0022</b> |
| spermidine    | 1,000 | ± | 0,1504 | 0,8204 | ± | 0,0583 | 0,3232        |
| HO-proline    | 1,000 | ± | 0,0460 | 0,8686 | ± | 0,0179 | <b>0,0332</b> |
| threonine     | 1,000 | ± | 0,0465 | 1,0207 | ± | 0,0403 | 0,7668        |
| tryptophan    | 1,000 | ± | 0,1325 | 0,9917 | ± | 0,1498 | 0,9705        |
| tyramine      | 1,000 | ± | 0,0826 | 1,0656 | ± | 0,0715 | 0,6059        |
| tyrosine      | 1,000 | ± | 0,4752 | 1,4619 | ± | 0,2834 | 0,5188        |
| uracil        | 1,000 | ± | 0,1723 | 1,0755 | ± | 0,2215 | 0,8194        |
| valine        | 1,000 | ± | 0,0188 | 1,0942 | ± | 0,0212 | <b>0,0163</b> |

PHOSPHATE-  
ESTER

|                |       |   |        |        |   |        |               |
|----------------|-------|---|--------|--------|---|--------|---------------|
| fru-6-P        | 1,000 | ± | 0,1041 | 0,5206 | ± | 0,1547 | <b>0,0077</b> |
| glc-6-P        | 1,000 | ± | 0,1318 | 0,4426 | ± | 0,2719 | <b>0,0172</b> |
| glyceral-3-P   | 1,000 | ± | 0,0495 | 0,9663 | ± | 0,0566 | 0,6858        |
| glyceric-3-P   | 1,000 | ± | 0,0095 | 1,0663 | ± | 0,0116 | <b>0,0031</b> |
| myo-ino-1-P    | 1,000 | ± | 0,3660 | 0,8149 | ± | 0,3289 | 0,7173        |
| P-eno/pyruvate | 1,000 | ± | 0,1272 | 0,9000 | ± | 0,1531 | 0,7100        |
