# Supplementary material
Source: PubMed Central journal article supplement (PMC1475465)
Supplement: plntphys_pp.106.081208_5.pdf [file plntphys_pp.106.081208_5.pdf]

**Table 2S:**

Overview of transcripts that are at least two-fold down- or up-regulated in both replicate experiments with DTT.

*control*: RMA normalised intensity value for the control incubation. *DTT*: RMA normalised intensity value for the DTT treated tissue. *call*: the present (P) or absent (P) call as defined by the MAS5 analyses software. *ratio*: DTT to control ratio of the normalised intensity values. *Log2[ratio]*: log2 transformed value of the ratio. The *average log2[ratio]* and its *p-value* are calculated using the AfflymGUI software package from Bioconductor.

| ATH1 code   | replica 1 |      |      |       | replica 2 |       |      |       | average     |         | annotation Tigr5 |       |         |       |                                                                                                       |
|-------------|-----------|------|------|-------|-----------|-------|------|-------|-------------|---------|------------------|-------|---------|-------|-------------------------------------------------------------------------------------------------------|
|             | control   | call | DTT  | ratio | control   | call  | DTT  | ratio | log2[ratio] | p-value |                  |       |         |       |                                                                                                       |
| 266743_at   | 702       | P    | 97   | M     | 0.14      | -2.85 | 551  | P     | 78          | A       | 0.14             | -2.82 | -2.8357 | 0.000 | At2g02990: ribonuclease 1 (RNS1)                                                                      |
| 261177_at   | 1007      | P    | 131  | P     | 0.13      | -2.94 | 378  | P     | 116         | P       | 0.31             | -1.71 | -2.3240 | 0.017 | At1g04770: male sterility MS5 family protein                                                          |
| 267645_at   | 1063      | P    | 151  | P     | 0.14      | -2.82 | 722  | P     | 216         | P       | 0.30             | -1.74 | -2.2782 | 0.003 | At2g32860: glycosyl hydrolase family 1 protein                                                        |
| 245151_at   | 962       | P    | 335  | P     | 0.35      | -1.52 | 538  | P     | 122         | P       | 0.23             | -2.15 | -1.8326 | 0.053 | At2g47550: pectinesterase family protein                                                              |
| 245317_at   | 2922      | P    | 1186 | P     | 0.41      | -1.30 | 870  | P     | 210         | P       | 0.24             | -2.05 | -1.6744 | 0.228 | At4g15610: integral membrane family protein                                                           |
| 249752_at   | 398       | P    | 101  | P     | 0.25      | -1.98 | 427  | P     | 185         | P       | 0.43             | -1.21 | -1.5911 | 0.013 | At5g24660: expressed protein                                                                          |
| 260438_at   | 366       | P    | 134  | P     | 0.37      | -1.45 | 234  | P     | 79          | P       | 0.34             | -1.56 | -1.5048 | 0.022 | At1g68290: bifunctional nuclease, putative                                                            |
| 255261_s_at | 1884      | P    | 610  | P     | 0.32      | -1.63 | 1394 | P     | 554         | P       | 0.40             | -1.33 | -1.4789 | 0.003 | At4g05110: equilibrative nucleoside transporter, putative (ENT6); At4g05120: equilibrative nucleoside |
| 246944_at   | 1565      | P    | 699  | P     | 0.45      | -1.16 | 963  | P     | 286         | P       | 0.30             | -1.75 | -1.4578 | 0.068 | At5g25450: ubiquinol-cytochrome C reductase complex 14 kDa protein, putative                          |
| 260528_at   | 329       | P    | 128  | P     | 0.39      | -1.37 | 273  | P     | 101         | P       | 0.37             | -1.44 | -1.4018 | 0.003 | At2g47260: WRKY family transcription factor                                                           |
| 250448_at   | 589       | P    | 167  | P     | 0.28      | -1.82 | 396  | P     | 193         | P       | 0.49             | -1.04 | -1.4253 | 0.007 | At5g10820: integral membrane transporter family protein                                               |
| 255284_at   | 608       | P    | 195  | P     | 0.32      | -1.64 | 571  | P     | 270         | P       | 0.47             | -1.08 | -1.3595 | 0.004 | At4g04610: 5'-adenylylsulfate reductase (APR1) / PAPS reductase homolog (PRH19)                       |
| 256177_at   | 683       | P    | 247  | P     | 0.36      | -1.46 | 559  | P     | 243         | P       | 0.44             | -1.20 | -1.3314 | 0.002 | At1g51620: protein kinase family protein                                                              |
| 248812_at   | 494       | P    | 258  | P     | 0.52      | -0.93 | 542  | P     | 151         | P       | 0.28             | -1.84 | -1.3893 | 0.015 | At5g47330: palmitoyl protein thioesterase family protein                                              |
| 247730_at   | 197       | P    | 93   | A     | 0.47      | -1.08 | 238  | P     | 79          | A       | 0.33             | -1.59 | -1.3351 | 0.002 | At5g59580: UDP-glucuronosyl/UDP-glucosyl transferase family protein                                   |
| 259375_at   | 2149      | P    | 499  | P     | 0.23      | -2.11 | 3385 | P     | 1952        | P       | 0.58             | -0.79 | -1.4505 | 0.148 | At3g16370: GDSL-motif lipase/hydrolase family protein                                                 |
| 252437_at   | 1115      | P    | 538  | P     | 0.48      | -1.05 | 628  | P     | 219         | P       | 0.35             | -1.52 | -1.2877 | 0.102 | At3g47380: invertase/pectin methylesterase inhibitor family protein                                   |
| 266089_at   | 2242      | P    | 1045 | P     | 0.47      | -1.10 | 1280 | P     | 498         | P       | 0.39             | -1.36 | -1.2323 | 0.083 | At2g38010: ceramidase family protein                                                                  |
| 246463_at   | 1475      | P    | 595  | P     | 0.40      | -1.31 | 1172 | P     | 567         | P       | 0.48             | -1.05 | -1.1793 | 0.003 | At5g16970: NADP-dependent oxidoreductase, putative (P1)                                               |
| 251895_at   | 3057      | P    | 1391 | P     | 0.45      | -1.14 | 1573 | P     | 684         | P       | 0.43             | -1.20 | -1.1692 | 0.104 | At3g54420: class IV chitinase (CHIV)                                                                  |
| 252984_at   | 386       | P    | 160  | A     | 0.42      | -1.27 | 253  | P     | 124         | A       | 0.49             | -1.03 | -1.1466 | 0.020 | At4g37990: mannitol dehydrogenase, putative (ELI3-2)                                                  |
| 260386_at   | 343       | P    | 176  | A     | 0.51      | -0.96 | 263  | P     | 107         | A       | 0.41             | -1.30 | -1.1290 | 0.030 | At1g74010: strictosidine synthase family protein                                                      |
| 264749_at   | 209       | P    | 91   | P     | 0.44      | -1.19 | 251  | P     | 123         | P       | 0.49             | -1.03 | -1.1108 | 0.009 | At1g22830: pentatricopeptide (PPR) repeat-containing protein                                          |
| 245181_at   | 220       | P    | 109  | P     | 0.50      | -1.01 | 120  | P     | 53          | P       | 0.44             | -1.17 | -1.0911 | 0.111 | At5g12420: expressed protein                                                                          |
| 250365_at   | 96        | P    | 39   | P     | 0.41      | -1.30 | 222  | P     | 119         | P       | 0.54             | -0.90 | -1.1004 | 0.231 | At5g11410: protein kinase family protein                                                              |
| 265411_at   | 339       | P    | 157  | P     | 0.46      | -1.11 | 341  | P     | 165         | P       | 0.48             | -1.05 | -1.0801 | 0.001 | At2g16630: proline-rich family protein                                                                |
| 257093_at   | 263       | P    | 131  | P     | 0.50      | -1.01 | 253  | P     | 116         | P       | 0.46             | -1.13 | -1.0706 | 0.002 | At3g20570: plastocyanin-like domain-containing protein                                                |
| 249283_at   | 2521      | P    | 1259 | P     | 0.50      | -1.00 | 1839 | P     | 846         | P       | 0.46             | -1.12 | -1.0610 | 0.028 | At5g41800: amino acid transporter family protein                                                      |
| 260551_at   | 744       | P    | 341  | P     | 0.46      | -1.13 | 694  | P     | 357         | P       | 0.51             | -0.96 | -1.0439 | 0.001 | At2g43510: trypsin inhibitor, putative                                                                |

  

| ATH1 code   | replica 1 |      |       |       | replica 2 |      |      |       | average     |         | annotation Tigr5 |      |        |       |                                                                                                        |
|-------------|-----------|------|-------|-------|-----------|------|------|-------|-------------|---------|------------------|------|--------|-------|--------------------------------------------------------------------------------------------------------|
|             | control   | call | DTT   | ratio | control   | call | DTT  | ratio | log2[ratio] | p-value |                  |      |        |       |                                                                                                        |
| 253228_at   | 216       | P    | 2242  | P     | 10.39     | 3.38 | 261  | P     | 1739        | P       | 6.67             | 2.74 | 3.0580 | 0.000 | At4g34630: expressed protein                                                                           |
| 247293_at   | 71        | P    | 746   | P     | 10.54     | 3.40 | 64   | P     | 258         | P       | 4.06             | 2.02 | 2.7102 | 0.013 | At5g64510: expressed protein                                                                           |
| 253687_at   | 212       | P    | 1969  | P     | 9.27      | 3.21 | 210  | P     | 803         | P       | 3.82             | 1.93 | 2.5729 | 0.009 | At4g29520: expressed protein                                                                           |
| 261485_at   | 352       | P    | 2427  | P     | 6.89      | 2.78 | 261  | P     | 1370        | P       | 5.25             | 2.39 | 2.5889 | 0.003 | At1g14360: UDP-galactose/UDP-glucose transporter, putative                                             |
| 247494_at   | 950       | P    | 6367  | P     | 6.71      | 2.75 | 614  | P     | 2236        | P       | 3.64             | 1.86 | 2.3046 | 0.026 | At5g61790: calnexin 1 (CNX1)                                                                           |
| 245956_s_at | 2004      | P    | 12563 | P     | 6.27      | 2.65 | 1457 | P     | 4689        | P       | 3.22             | 1.69 | 2.1676 | 0.024 | At5g42020: luminal binding protein 2 (BiP-2) (BP2); At5g28540: luminal binding protein 1 (BiP-1) (BP1) |
| 256911_at   | 61        | A    | 424   | P     | 6.97      | 2.80 | 64   | P     | 127         | P       | 1.99             | 0.99 | 1.8973 | 0.053 | At3g24090: glucosamine--fructose-6-phosphate aminotransferase (isomerizing), putative /                |
| 267483_at   | 271       | P    | 1451  | P     | 5.35      | 2.42 | 167  | P     | 585         | P       | 3.50             | 1.81 | 2.1118 | 0.025 | At2g02810: UDP-galactose/UDP-glucose transporter                                                       |
| 250930_at   | 136       | P    | 779   | P     | 5.71      | 2.51 | 141  | P     | 374         | P       | 2.66             | 1.41 | 1.9640 | 0.012 | At5g03160: DNAJ heat shock N-terminal domain-containing protein                                        |
| 259757_at   | 287       | P    | 1374  | P     | 4.79      | 2.26 | 136  | P     | 287         | P       | 2.11             | 1.08 | 1.6687 | 0.161 | At1g77510: protein disulfide isomerase, putative                                                       |
| 249944_at   | 101       | P    | 464   | P     | 4.60      | 2.20 | 99   | P     | 201         | P       | 2.04             | 1.03 | 1.6147 | 0.031 | At5g22290: no apical meristem (NAM) family protein                                                     |
| 250625_at   | 73        | P    | 293   | P     | 4.03      | 2.01 | 64   | P     | 126         | P       | 1.96             | 0.97 | 1.4929 | 0.041 | At5g07340: calnexin, putative                                                                          |
| 251182_at   | 1865      | P    | 6013  | P     | 3.22      | 1.69 | 819  | P     | 2262        | P       | 2.76             | 1.46 | 1.5767 | 0.096 | At3g62600: DNAJ heat shock family protein                                                              |
| 266869_at   | 131       | P    | 396   | P     | 3.02      | 1.59 | 157  | P     | 329         | P       | 2.09             | 1.06 | 1.3286 | 0.003 | At2g44660: ALG6, ALG8 glycosyltransferase family protein                                               |
| 248327_at   | 401       | P    | 860   | P     | 2.14      | 1.10 | 553  | P     | 1189        | P       | 2.15             | 1.11 | 1.1030 | 0.019 | At5g52750: heavy-metal-associated domain-containing protein                                            |
